# Supplementary material
Source: Copernicus journal article supplement (doi:10.5194/essd-2026-253)
Supplement: Supplementary file 1 [file essd-2026-253-supplement.pdf]

**Supplement of Circum-Arctic Sediment PROvenance Database (CASPROD): A database of mineralogy and geochemistry for the Circum-Arctic surface sediments**

Zhengquan Yao et al.

Correspondence to: Zhengquan Yao (yaozq@fio.org.cn)

**Full list of references used in CASPROD**

1. Andreeva, I. A.: Heavy mineral contents in 50-100  $\mu\text{m}$  grain size fraction of the surface layer of bottom sediments from the Eastern Arctic Seas, 14971 data points, doi:10.1594/PANGAEA.143600, 2004a.
2. Andreeva, I. A.: Light mineral contents in 50-100  $\mu\text{m}$  grain size fraction of the surface sediment layer from the Eastern Arctic seas, 5536 data points, doi:10.1594/PANGAEA.143725, 2004b.
3. Andrews, J. T.: Baffin Bay/Nares Strait surface (seafloor) sediment mineralogy: Further investigations and methods to elucidate spatial variations in provenance, *Can. J. Earth Sci.*, 56(8), 814-828, doi:10.1139/cjes-2018-0207, 2019.
4. Asahara, Y., Takeuchi, F., Nagashima, K., Harada, N., Yamamoto, K., Oguri, K. and Tadai, O.: Provenance of terrigenous detritus of the surface sediments in the Bering and Chukchi Seas as derived from Sr and Nd isotopes: Implications for recent climate change in the Arctic regions, *Deep-Sea Res. II*, 61-64, 155-171, doi:10.1016/j.dsr2.2011.12.004, 2012.
5. Bazhenova, E. A., Vogt, C. and Stein, R.: Results of X-ray diffraction analysis and quantification of mineral phases based on the RockJock quantitative analysis and the full-pattern method QUAX of Arctic Ocean surface sediments, 1247 data points, doi:10.1594/PANGAEA.792555, 2012.
6. Bazhenova, E., Fagel, N. and Stein, R.: North American origin of “pink–white” layers at the Mendeleev Ridge (Arctic Ocean): New insights from lead and neodymium isotope composition of detrital sediment component, *Mar. Geol.*, 386,

44-55, doi:10.1016/j.margeo.2017.01.010, 2017.

7. Behrends, M.: Distribution of heavy minerals in sediment cores from the Laptev Sea continental margin and the central Arctic Ocean, Supplement to: Behrends, M (1999): Rekonstruktion von Meereisdrift und terrigenem Sedimenteintrag im Spätquartär: Schwermineralassoziationen in Sedimenten des Laptev-See-Kontinentalrandes und des zentralen Arktischen Ozeans (Reconstruction of sea-ice drift and terrigenous sediment supply in the Late Quaternary: Heavy-mineral associations in sediments of the Laptev Sea continental margin and the central Arctic Ocean), 15 datasets, doi:10.1594/PANGAEA.866938, 2003.
8. Berner, H.: Mechanismen der sedimentbildung in der Framstraße, im Arktischen Ozean und in der Norwegischen See, Ber. Fachbereich Geowiss. Univ. Bremen, 20, 167 S., urn:nbn:de:gbv:46-ep000106655, 1991.
9. Bondarev, V. N. and Kosheleva, V. A.: Clay mineral composition of <0.001 mm size fraction of sediments from Hole AMIGE-1993-157 drilled in the Kara Sea, 544 data points, doi:10.1594/PANGAEA.587082, 2007a.
10. Bondarev, V. N. and Kosheleva, V. A.: Clay mineral composition of <0.001 mm size fraction of sediments from Hole AMIGE-1993-161 drilled in the Kara Sea, 477 data points, doi:10.1594/PANGAEA.611701, 2007b.
11. Bondarev, V. N. and Kosheleva, V. A.: Clay mineral composition of <0.001 mm size fraction of sediments from Hole AMIGE-1993-165 drilled in the Barents Sea, 432 data points, doi:10.1594/PANGAEA.587083, 2007c.
12. Bondarev, V. N. and Kosheleva, V. A.: Clay mineral composition of <0.001 mm grain size fraction of sediments from Hole AMIGE-1993-202 drilled in the Barents Sea, 980 data points, doi:10.1594/PANGAEA.611941, 2007d.
13. Bondarev, V. N. and Kosheleva, V. A.: Clay mineral composition of <0.001 mm grain size fraction of sediments from Hole AMIGE-1993-210 drilled in the Barents Sea, 520 data points, doi:10.1594/PANGAEA.611947, 2007e.
14. Carnero-Bravo, V., Falardeau, J., Chassiot, L., Tanski, G., Hillaire-Marcel, C., Ghaleb, B., de Vernal, A., Vonk, J. E., Lantuit, H., Fritz, M. and Preda, M.: Sediment structure and deposition rates in the Yukon coast, 3 datasets,

doi:10.1594/PANGAEA.937387, 2021.

15. Chen, Z., Shi, X., Han, Y., Xin, C. and Yang, Z.: Clay mineral distributions in surface sediments from the western Arctic Ocean and their implications for sediment environments, *Advances in Marine Sciences*, 22(4), 446-454, doi:10.3969/j.issn.1671-6647.2004.04.006, 2004.
16. Darby, D., Naidu, S. A., Mowatt, T. C. and Jones, G.: Sediment composition and sedimentary processes in the Arctic Ocean, *The Arctic Seas: Climatology, Oceanography, Geology, and Biology*, 24, 657-720, doi:10.1007/978-1-4613-0677-1\_24, 1989.
17. Deschamps, C.-E., Montero-Serrano, J.-C. and St-Onge, G.: Sediment provenance changes in the Western Arctic Ocean in response to ice rafting, sea level, and oceanic circulation variations since the Last Deglaciation, *Geochem., Geophys., Geosyst.*, 19(7), 2147-2165, doi:10.1029/2017GC007411, 2018.
18. Deschamps, C.-E., Montero-Serrano, J.-C., St-Onge, G. and Poirier, A.: Holocene changes in deep water circulation inferred from authigenic Nd and Hf isotopes in sediment records from the Chukchi-Alaskan and Canadian Beaufort Margins, *Paleoceanogr. and Paleoclimatol.*, 34(7), 1038-1056, doi:10.1029/2018PA003485, 2019.
19. Dong, L., Liu, Y., Shi, X., Polyak, L., Huang, Y., Fang, X., Liu, J., Zou, J., Wang, K., Sun, F. and Wang, X.: Sedimentary record from the Canada Basin, Arctic Ocean: Implications for Late to Middle Pleistocene glacial history, *Clim. Past*, 13(5), 511-531, doi:10.5194/cp-13-511-2017, 2017.
20. Dong, L., Polyak, L., Liu, Y., Shi, X., Zhang, J. and Huang, Y.: Isotopic fingerprints of ice-rafted debris offer new constraints on Middle to Late Quaternary Arctic circulation and glacial history, *Geochem., Geophys., Geosyst.*, 21, e2020GC009019, doi:10.1029/2020GC009019, 2020.
21. Dong, L., Polyak, L., Xiao, X., Brachfeld, S., Liu, Y., Shi, X., Fang, X., Bai, Y., Zhu, A., Li, C., Zhao, S., Wu, D. and Wang, C.: A Eurasian Basin sedimentary record of glacial impact on the central Arctic Ocean during MIS 1-4, *Glob. Planet. Change*, 219, 103993, doi:10.1016/j.gloplacha.2022.103993, 2022.

22. Dong, L., Shi, X., Liu, Y., Fang, X., Chen, Z., Wang, C., Zou, J. and Huang, Y.: Minerals in surface sediments in the western Arctic Ocean and their sources, *Chinese Journal of Polar Research*, 26(1), 95-107, doi:10.13679/j.jdyj.2014.1.058, 2014.
23. Eisenhauer, A., Meyer, H., Rachold, V., Tütken, T., Wiegand, B., Hansen, B.T., Spielhagen, R.F., Lindemann, F. and Kassens, H.: Grain size separation and sediment mixing in Arctic Ocean sediments: evidence from the strontium isotope systematic, *Chem. Geol.*, 158(3-4), 173-188, doi:10.1016/S0009-2541(99)00026-1, 1999.
24. Evsyukov, V. G.: Clay mineral composition of <0.001 mm grain size fraction of sedimentary rocks from Hole VNIIO-1987-Lengr-01 drilled in the Kara Sea, 136 data points, doi:10.1594/PANGAEA.676867, 2008.
25. Fagel, N., Not, C., Gueibe, J., Mattielli, N. and Bazhenova, E.: Late Quaternary evolution of sediment provenances in the Central Arctic Ocean: mineral assemblage, trace element composition and Nd and Pb isotope fingerprints of detrital fraction from the Northern Mendeleev Ridge, *Quat. Sci. Rev.*, 92, 140-154, doi:10.1016/j.quascirev.2013.12.011, 2014.
26. Feng, H., Yao, Z., Shi, X., Zhang, Z., Lu, H., Zhang, H., Liu, Y., Shan, X., Dong, J., Dong, L., Yang, G., Hu, L., Vasilenko, Y., Astakhov, A. and Bosin, A.: Arctic zircon U-Pb ages reveal multiphase glaciations in East Siberia during the late Quaternary, *Nat. Commun.*, 16, 7511, doi:10.1038/s41467-025-62499-y, 2025.
27. Gamboa, A., Montero-Serrano, J.-C., St-Onge, G., Rochon, A. and Desiège, P.-A.: Mineralogical, geochemical and magnetic signatures of surface sediments from the Canadian Beaufort Shelf and Amundsen Gulf (Canadian Arctic), *Geochem., Geophys., Geosyst.*, 18(2), 488-512, doi:10.1002/2016GC006477, 2017.
28. Guo, L., Semiletov, I., Gustafsson, Ö., Ingri, J., Andersson, P., Dudarev, O. and White, D.: Characterization of Siberian Arctic coastal sediments: Implications for terrestrial organic carbon export, *Global Biogeochem. Cycles*, 18, GB1036, doi:10.1029/2003GB002087, 2004.
29. Haley, B.A., Frank, M., Spielhagen, R.F. and Fietzke, J.: Radiogenic isotope record

- of Arctic Ocean circulation and weathering inputs of the past 15 million years, *Paleoceanogr.*, 23, PA1S13, doi:10.1029/2007PA001486, 2008.
30. Hillaire-Marcel, C., Maccali, J., Not, C. and Poirier, A.: Geochemical and isotopic tracers of Arctic sea ice sources and export with special attention to the Younger Dryas interval, *Quat. Sci. Rev.*, 79, 184-190, doi:10.1016/j.quascirev.2013.05.001, 2013.
  31. Jang, K., Bayon, G., Vogt, C., Forwick, M., Ahn, Y., Kim, J.-H. and Nam, S.-I.: Non-linear response of glacier melting to Holocene warming in Svalbard recorded by sedimentary iron (oxyhydr)oxides, *Earth Planet. Sci. Lett.*, 607, 118054, doi:10.1016/j.epsl.2023.118054, 2023.
  32. Jennings, A. E., Andrews, J. T., Oliver, B., Walczak, M. and Mix, A.: Retreat of the Smith Sound ice stream in the Early Holocene, *Boreas*, 48(4), 825-840, doi:10.1111/bor.12391, 2019.
  33. Junttila, J., Aagaard-Sørensen, S., Husum, K. and Hald, M.: Late Glacial-Holocene clay minerals elucidating glacial history in the SW Barents Sea, *Mar. Geol.*, 276(1-4), 71-85, doi:10.1016/j.margeo.2010.07.009, 2010.
  34. Kalinenko, V. V.: Clay mineral composition of surface sediment from the Siberian and Laptev Seas (fig 1), doi:10.1594/PANGAEA.57443, 2000.
  35. Kalinenko, V. V.: Clay minerals in sediments of the Arctic Seas, *Lithol. Miner. Resour.*, 36 (4), 362-372, doi:10.1023/A:1010414305264, 2001.
  36. Klenova, M. V.: Heavy mineral contents in 0.1-0.05 mm grain size fraction of bottom sediments from the Barents Sea and adjacent areas, 4111 data points, doi:10.1594/PANGAEA.141122, 2004.
  37. Komarnitsky, V. M.: Clay mineral composition of <0.001 mm grain size fraction of sedimentary rocks from Hole VNIIO-1985-82 drilled in the Barents Sea, In: Komarnitsky, V. M., Evsyukov, V. G., Ustinov, N. V. (1990): Processing results from drill hole VNIIO-1985-82, 136 data points, doi:10.1594/PANGAEA.676949, 2008a.
  38. Komarnitsky, V. M.: Clay mineral composition of <0.001 mm grain size fraction of sedimentary rocks from Hole VNIIO-1988-Sht-01 drilled in the Barents Sea, In:

- Komarnitsky, V. M., Evsyukov, V. G., Ustinov, N. V. (1989): Processing results from drill hole VNIIO-1988-Sht-01 on the shelf of the Barents Sea, 352 data points, doi:10.1594/PANGAEA.680813, 2008b.
39. Komarnitsky, V. M.: Clay mineral composition of <0.001 mm grain size fraction of sedimentary rocks from Hole VNIIO-1985-Arct-01 drilled in the Barents Sea, In: Komarnitsky, Valery M; Evsyukov, Vladimir G; Ustinov, Nikolaj V (1990): Processing results from drill hole VNIIO-1985-Arct-01, 816 data points, doi:10.1594/PANGAEA.676850, 2008c.
  40. Komarnitsky, V. M.: Clay mineral composition of <0.001 mm grain size fraction of sedimentary rocks from Hole VNIIO-1985-Kur-01 drilled in the Barents Sea, In: Komarnitsky, V. M., Evsyukov, V. G., Ustinov, N. V.: Processing results from drill hole VNIIO-1985-Kur-01, 432 data points, doi:10.1594/PANGAEA.676863, 2008d.
  41. Kosheleva, V A: Clay mineral composition of <0.001 mm grain size fraction of sediments from Hole VNIIO-1987-10a drilled in the Barents Sea, 90 data points, doi:10.1594/PANGAEA.679771,2008a.
  42. Kosheleva, V A: Clay mineral composition of <0.001 mm grain size fraction of sediments and sedimentary rocks from Hole VNIIO-1987-15-16-Adm drilled in the Barents Sea, 90 data points, doi:10.1594/PANGAEA.676739,2008b.
  43. Kosheleva, V A: Clay mineral composition of <0.005 mm grain size fraction of sedimentary rocks from Hole VNIIO-1987-17-18 drilled in the Barents Sea, 240 data points, doi:10.1594/PANGAEA.679773,2008c
  44. Kosheleva, V. A.: Mineral composition of sediments and sedimentary rocks from Hole VNIIO-1987-17-18 drilled in the Barents Sea, 648 data points, doi:10.1594/PANGAEA.679774, 2008d.
  45. Kosheleva, V. A.: Mineral composition of sediments and sedimentary rocks from Hole VNIIO-1987-15-16-Adm drilled in the Barents Sea, 171 data points, doi:10.1594/PANGAEA.676643, 2008e.
  46. Kosheleva, V. A.: Mineral composition of sediments from Hole VNIIO-1987-116 drilled in the Barents Sea, 383 data points, doi:10.1594/PANGAEA.678238, 2008f.

47. Kosheleva, V. A.: Mineral composition of sediments from Hole VNIIO-1987-10a drilled in the Barents Sea, 1053 data points, doi:10.1594/PANGAEA.679768, 2008g.
48. Kosheleva, V. A.: Mineral composition of sediments from Hole VNIIO-1987-114 drilled in the Barents Sea, 135 data points, doi:10.1594/PANGAEA.679769, 2008h.
49. Kosheleva, V. A. and Bondarev, V. N.: Clay mineral composition of <0.005 mm grain size fraction of sediments from Hole AMIGE-1993-155 drilled in the Barents Sea, 664 data points, doi:10.1594/PANGAEA.676835, 2008a.
50. Kosheleva, V. A. and Bondarev, V. N.: Clay mineral composition of <0.01 mm grain size fraction of sediments from Hole AMIGE-1993-219 drilled in the Barents Sea, In: Kosheleva, VA; Bondarev, VN (1993): Processing results from drill hole AMIGE-1993-219 drilled in the Barents Sea, 300 data points, doi:10.1594/PANGAEA.676844, 2008b.
51. Kosheleva, V. A. and Bondarev, V. N.: Clay mineral composition of <0.001 mm size fraction of sediments from Hole AMIGE-1993-187 drilled in the Barents Sea, 90 data points, doi:10.1594/PANGAEA.618938, 2007.
52. Kosheleva, V. A. and Bondarev, V. N.: Processing results from drill hole AMIGE-1993-161 drilled in the central Kara Sea (Murmansk), 4 dataset, doi:10.1594/PANGAEA.688740, 1993a.
53. Kosheleva, V. A. and Bondarev, V. N.: Processing results from drill hole AMIGE-1993-219 drilled in the Barents Sea, Central Rise (Murmansk), 4 datasets, doi:10.1594/PANGAEA.688741, 1993b.
54. Kosheleva, V. A.: Clay mineral composition of <0.001 mm grain size fraction of sediments from Core FL-324, Arctic Ocean, 176 data points, doi:10.1594/PANGAEA.615267, 2007a.
55. Kosheleva, V. A.: Heavy mineral composition of 0.100-0.050 mm size fraction of sediments from Core FL-324, Arctic Ocean, 528 data points, doi:10.1594/PANGAEA.615271, 2007b.
56. Krylov, A. A., Andreeva, I. A., Vogt, C., Backman, J., Krupskaya, V. V., Grikurov, G. E., Moran, K. and Shoji, H.: A shift in heavy and clay mineral provenance

indicates a Middle Miocene onset of a perennial sea ice cover in the Arctic Ocean, *Paleoceanogr.*, 23, PA1S06, doi:10.1029/2007PA001497, 2008.

57. Krylov, A. A., Stein, R. and Ermakova, L. A.: Clay minerals as indicators of Late Quaternary sedimentation constraints in the Mendeleev Rise, Amerasian Basin, Arctic Ocean, *Lithol. Miner. Resour.*, 49(1), 103-116, doi:10.1134/S0024490213060059, 2014.
58. Krylov, A. A., Weiel, D., Sapega, V. F., Ivanov, G. I., Stein, R., Vogt, C. and Rys'kova, E. O.: Clay minerals as an Indicator of the accumulation of the Upper Quaternary deposits in the St. Anna Trough (Kara Sea), *Oceanology*, 48(1), 85-93, doi:10.1134/S0001437008010104, 2008.
59. Kulikov, N. N.: Heavy mineral composition of 0.1-0.05 mm grain size fraction from kara sea sediments, 13772 data points, doi:10.1594/PANGAEA.185911, 2004.
60. Levitan, M., Dekov, V. and Gorbunova, Z. N.: The Kara Sea: A reflection of modern environment in grain size, mineralogy, and chemical composition of the surface layer of bottom sediments, *Ber. Polarforsch.*, 212, 58-80, 1996.
61. Li, Q., Qiao, S, Shi, X., Hu, L., Chen, Y., Bai, Y., Zhu, A. and Cui, J.: Sediment provenance of the East Siberian Arctic Shelf: Evidence from clay minerals and chemical elements. *Haiyang Xuebao*, 43(3): 76–89, doi:10.12284/hyxb2021041, 2021.
62. Li, Q., Qiao, S., Shi, X., Chen, Y., Astakhov, A., Zhang, H., Hu, L., Yang, G., Bosin, A., Vasilenko, Y. and Dong, L.: Sr, Nd, and Pb isotope provenance of surface sediments on the East Siberian Arctic Shelf and implications for transport pathways, *Chem. Geol.*, 618, 121277, doi:10.1016/j.chemgeo.2022.121277, 2023.
63. Maccali, J., Hillaire-Marcel, C. and Not, C.: Radiogenic isotope (Nd, Pb, Sr) signatures of surface and sea ice-transported sediments from the Arctic Ocean under the present interglacial conditions, *Polar Res.*, 37(1), 1442982, doi:10.1080/17518369.2018.1442982, 2018.
64. Müller, C. and Stein, R.: Grain size and clay mineralogy from two Siberian rivers (appendix 1), 156 data points, doi:10.1594/PANGAEA.57454, 2000.

65. Muratli, J.M., Polyak, L., Haley, B.A. and Kuznetsov, A.: North American Glaciations and Pacific Inputs in the Nd and Sr Isotope Pleistocene Record From the Western Arctic Ocean, *Paleoceanogr. and Paleoclimatol.*, 37(10), e2022PA004479, doi:10.1029/2022PA004479, 2022.
66. Myers, W. B. and Darby, D. A.: A compilation of the silt and clay mineralogy from coastal and shelf regions of the Arctic Ocean, *Mar. Geol.*, 454, 106948, doi:10.1016/j.margeo.2022.106948, 2022.
67. Naidu, A. S. and Mowatt, T. C.: Sources and dispersal patterns of clay minerals in surface sediments from the continental-shelf areas off Alaska, *GSA Bulletin*, 94, 841-854, doi:10.1130/0016-7606(1983)94<841:SADPOC>2.0.CO;2, 1983.
68. Naidu, A. S., Burrell, D. C. and Hood, D. W.: Clay mineral composition and geologic significance of some Beaufort Sea sediments, *J. Sediment. Res.*, 41(3), 691-694, doi:10.1306/74D72329-2B21-11D7-8648000102C1865D, 1971.
69. Nürnberg, D., Levitan, M. A., Pavlidis, Y. A. and Shelekhova, E. S.: Distribution of clay minerals in surface sediments from the Eastern Barents and South-Western Kara Seas, *Geol. Rundsch.*, 84(3), 665–682, doi:10.1007/BF00284528, 1995.
70. Okuma, E., Hingst, J., Weiser, J., Madaj, L., Titschack, J., Vogt, C., Kienast, M., Hillaire-Marcel, C., Hebbeln, D. and Kasemann, S. A.: Deglacial and Holocene sediment dynamics and provenances off Lancaster Sound: Implications for paleoenvironmental conditions in northern Baffin Bay, *Quat. Sci. Rev.*, 309, 108101, doi:10.1016/j.quascirev.2023.108101, 2023.
71. Pavlidis, Y. A., Kalinenko, V. V., Aksenov, A. A. and Aibulatov, N. A.: Mineral composition of 356 sediment profiles from the Arctic seas, 356 datasets, doi:10.1594/PANGAEA.728935, 2003.
72. Pavlov, O. G.: Clay mineral composition of <0.001 mm grain size fraction of sediments from Hole VNIIO-1987-Rus-01 drilled in the Kara Sea, 192 data points, doi:10.1594/PANGAEA.680775, 2008.
73. Pchelina, T. M.: Clay mineral composition of <0.001 mm grain size fraction of sedimentary rocks from Hole VNIIO-1984-80 drilled in the Barents Sea, In: Pchelina, Tatyana M; Bro, Evgeny G; Komarnitsky, Valery M (1985): Processing

- results from drill hole VNIIO-1984-80, 459 data points, doi:10.1594/PANGAEA.628501, 2007a.
74. Pchelina, T. M.: Clay mineral composition of <0.001 mm grain size fraction of sedimentary rocks from Hole VNIIO-1983-81 drilled in the Barents Sea, In: Pchelina, Tatyana M; Bro, Evgeny G; Basov, Valery A; Komarnitsky, Valery M (1984): Processing results from drill hole VNIIO-1983-81, 320 data points, doi:10.1594/PANGAEA.626574, 2007b.
  75. Peregovich, B.: Postglacial depositional history of the Laptev Sea: mineralogy and sedimentology, *Reps. Polar Res.*, 316, 1-85, doi:10.2312/BzP\_0316\_1999, 1999.
  76. Risebrobakken, B., Moros, M., Ivanova, E. V., Chistyakova, N. and Rosenberg, R.: Climate and oceanographic variability in the SW Barents Sea during the Holocene, *Holocene*, 20(4), 609–621, doi:10.1177/0959683609356586, 2010.
  77. Ronkina, Z. Z.: Clay mineral composition of <0.001 mm grain size fraction of sediments from Hole VNIIO-1989-08 drilled in the Barents Sea, 20 data points, doi:10.1594/PANGAEA.679300, 2008a.
  78. Ronkina, Z. Z.: Clay mineral composition of <0.001 mm grain size fraction of sedimentary rocks from Hole VNIIO-1984-22 drilled in the Barents Sea, In: Ronkina, Zinaida Z; Basov, Valery A; Bro, Evgeny G (1984): Processing results from drill hole VNIIO-1984-22, 304 data points, doi:10.1594/PANGAEA.678491, 2008b.
  79. Ronkina, Z. Z.: Clay mineral composition of <0.005 mm grain size fraction of sediments and sedimentary rocks from Hole VNIIO-1989-28 drilled in the Barents Sea, In: Ronkina, Zinaida Z; Bro, Evgeny G (1989): Processing results from drill hole VNIIO-1989-28 in the Murmanskaya Area, 90 data points, doi:10.1594/PANGAEA.679340, 2008c.
  80. Ronkina, Z. Z.: Clay mineral composition of <0.005 mm grain size fraction of sedimentary rocks from Hole VNIIO-1989-26 drilled in the Barents Sea, In: Ronkina, Zinaida Z; Bro, Evgeny G; Komarnitsky, Valery M (1989): Processing results from drill hole VNIIO-1989-26 in the Murmanskaya Area, 100 data points, doi:10.1594/PANGAEA.679334, 2008d.

81. Ronkina, Z. Z.: Clay mineral composition of <0.005 mm grain size fraction of sedimentary rocks from Hole VNIIO-1989-27 drilled in the Barents Sea, In: Ronkina, Zinaida Z; Bro, Evgeny G; Komarnitsky, Valery M (1989): Processing results from drill hole VNIIO-1989-27 in the Murmanskaya Area, 60 data points, doi:10.1594/PANGAEA.679339, 2008e.
82. Ronkina, Z. Z.: Clay mineral composition of <0.005 mm grain size fraction of sedimentary rocks from Hole VNIIO-1983-21 drilled in the Barents Sea, In: Ronkina, Zinaida Z; Basov, Valery A; Bro, Evgeny G (1983): Processing results from drill hole 21, 112 data points, doi:10.1594/PANGAEA.678449, 2008f.
83. Ronkina, Z. Z.: Clay mineral composition of <0.005 mm grain size fraction of sediments from Hole VNIIO-1983-23 drilled in the Barents Sea, In: Ronkina, Zinaida Z; Bro, Evgeny G; Sokolov, A (1985): Processing results from drill hole 23, 472 data points, doi:10.1594/PANGAEA.678456, 2008g.
84. Ronkina, Z. Z.: Clay mineral composition of <0.005 mm grain size fraction of sediments from Hole VNIIO-1983-25 drilled in the Barents Sea, In: Ronkina, Zinaida Z; Bro, Evgeny G (1989): Processing results from drill hole VNIIO-1983-25 in the Murmanskaya Area, 192 data points, doi:10.1594/PANGAEA.678483, 2008h.
85. Ronkina, Z. Z.: Clay mineral composition of <0.005 mm size fraction of sedimentary rocks from Hole VNIIO-1989-24 drilled in the Barents Sea, In: Ronkina, Zinaida Z; Komarnitsky, Valery M (1989): Processing results from drill hole VNIIO-1989-24 in the Murmanskaya Area, 330 data points, doi:10.1594/PANGAEA.679303, 2008i.
86. Rossak, B. T.: Clay minerals in surface sediment of the Laptev Sea (Table 1), 240 data points, doi:10.1594/PANGAEA.56285, 2000.
87. R  ther, D. C., Bjarnad  ttir, L. R., Junntila, J., Husum, K., Rasmussen, T. L., Lucchi, R. G. and Andreassen, K.: Pattern and timing of the Northwestern Barents Sea Ice Sheet deglaciation and indications of episodic Holocene deposition, *Boreas*, 41(3), 494-512, doi:10.1111/j.1502-3885.2011.00244.x, 2012.
88. Safonova, I., Maruyama, S., Hirata, T., Kon, Y. and Rino, S.: LA ICP MS U-Pb

- ages of detrital zircons from Russia largest rivers: Implications for major granitoid events in Eurasia and global episodes of supercontinent formation, *J. Geodyn.*, 50(3-4), 134-153, doi:10.1016/j.jog.2010.02.008, 2010.
89. Saukel, C., Stein, R., Vogt, C. and Shevchenko, V. P.: Clay-mineral and grain-size distributions in surface sediments of the White Sea (Arctic Ocean): Indicators of sediment sources and transport processes, *Geo-Marine Letters*, 30(6), 605-616, doi:10.1007/s00367-010-0210-2, 2010.
  90. Semyonov, Y. P.: Heavy mineral composition of 0.1-0.05 mm grain size fraction of bottom sediments from the East Siberian and Chukchi Seas, 25385 data points, doi:10.1594/PANGAEA.204044, 2004a.
  91. Semyonov, Y. P.: Light mineral composition of 0.1-0.05 mm grain size fraction of bottom sediments from the East Siberian and Chukchi Seas, 10294 data points, doi:10.1594/PANGAEA.204016, 2004b.
  92. Shi, F., Shi, X., Su, X., Fang, X., Wu, Y., Cheng, Z. and Yao, Z.: Clay minerals in Arctic Kongsfjorden surface sediments and their implications on provenance and paleoenvironmental change, *Acta Oceanol. Sin.*, 37(5), 29-38, doi:10.1007/s13131-018-1220-6, 2018.
  93. Song, T. F., Hillaire-Marcel, C., de Vernal, A. and Liu, Y. G.: A resilient ice cover over the Southernmost Mendeleev Ridge during the Late Quaternary, *Boreas*, 53(1), 106-123, doi:10.1111/bor.12632, 2024.
  94. Stein, R., Dittmers, K. H., Fahl, K., Kraus, M., Matthiessen, J., Niessen, F., Pirrung, M., Polyakova, Y. I., Schoster, F., Steinke, T. and Fütterer, D. K.: Arctic (palaeo) river discharge and environmental change: Evidence from the Holocene Kara Sea sedimentary record, *Quat. Sci. Rev.*, 23(11-13), 1485-1511, doi:10.1016/j.quascirev.2003.12.004, 2004.
  95. Stein, R., Fahl, K., Schade, I., Manerung, A., Wassmuth, S., Niessen, F. and Nam, S.-I.: Holocene variability in sea ice cover, primary production, and Pacific-Water inflow and climate change in the Chukchi and East Siberian Seas (Arctic Ocean), *J. Quat. Sci.*, 32(3), 362-379, doi:10.1002/jqs.2929, 2017.
  96. Tu, Y., Xiao, W., Wang, R. and Xu, R.: Sediment provenance variations in the

- Canada Basin, western Arctic Ocean since MIS8: Implications on Arctic ice sheet and circulation changes, *Quaternary Sciences*, 41(3): 632-645, doi:10.11928/j.issn.1001-7410.2021.03.02, 2021.
97. Tütken, T., Eisenhauer, A., Wiegand, B. and Hansen, B.T.: Glacial–interglacial cycles in Sr and Nd isotopic composition of Arctic marine sediments triggered by the Svalbard/Barents Sea ice sheet, *Mar. Geol.*, 182(3-4), 351-372, doi:10.1016/S0025-3277(01)00248-1, 2002.
98. Viscosi-Shirley, C., Mammone, K., Pisias, N. G. and Dymond, J. R.: Clay mineralogy and multi-element chemistry of surface sediments on the Siberian Arctic shelf: Implications for sediment provenance and grain size sorting, *Cont. Shelf Res.*, 23(11-13), 1175-1200, doi:10.1016/S0278-4343(03)00091-8, 2003.
99. Vogt, C. and Knies, J.: Sediment dynamics in the Eurasian Arctic Ocean during the Last Deglaciation - The clay mineral group smectite perspective, *Mar. Geol.*, 250 (3-4), 211-222, doi:10.1016/j.margeo.2008.01.006, 2008.
100. Vogt, C. and Knies, J.: Sediment pathways in the western Barents Sea inferred from clay mineral assemblages in surface sediments, *Norw. J. Geol.*, 89(1-2), 41-55, doi:10.1594/PANGAEA.853649, 2009.
101. Vogt, C.: Analysis of minerals from Arctic Ocean sediments, Supplement to: Vogt, C (1997): Zeitliche und räumliche Verteilung von Mineralvergesellschaftungen in spätquartären Sedimenten des Arktische Ozeans und ihre Nützlichkei t als Klimaindikatoren während der Glazial/Interglazial-Wechsel (Regional and temporal variations of mineral assemblages in Arctic Ocean sediments as climate indicator during glacial/interglacial changes), 87 datasets, doi:10.1594/PANGAEA.778039, 2012.
102. Vogt, C.: Bulk mineralogy in surface sediments from the eastern central Arctic Ocean, In: Stein, R; Ivanov, G I; Levitan, M A & Fahl, K (eds.), *Surface-sediment composition and sedimentary processes in the central Arctic Ocean and along the Eurasian Continental Margin*, *Rep. Polar Res.*, 212, 159-171, hdl:10013/epic.10213.d001, 1996.

103. Vogt, C.: Mineralogy of surface sediment samples from the Arctic Ocean, In supplement to: Vogt, C (1997): Zeitliche und räumliche Verteilung von Mineralvergesellschaftungen in spätquartären Sedimenten des Arktische Ozeans und ihre Nützlichkeiit als Klimaindikatoren während der Glazial/Interglazial-Wechsel (Regional and temporal variations of mineral assemblages in Arctic Ocean sediments as climate indicator during glacial/interglacial changes), 762 data points, doi:10.1594/PANGAEA.52472, 1997.
104. Wahsner, M., Müller, C., Stein, R., Ivanov, G. I., Levitan, M. A., Shelekhova, E. S. and Tarasov, G. A.: Clay-mineral distribution in surface sediments of the Eurasian Arctic Ocean and continental margin as indicator for source areas and transport pathways- a synthesis, *Boreas*, 28(1), 215-233, doi:10.1111/j.1502-3885.1999.tb00216.x, 1999.
105. Wang, C.Y., Campbell, I.H., Stepanov, A.S., Allen, C.M. and Burtsev, I.N.: Growth rate of the preserved continental crust: II. Constraints from Hf and O isotopes in detrital zircons from Greater Russian Rivers, *Geochim. Cosmochim. Acta*, 75(5), 1308-1345, doi:10.1016/j.gca.2010.12.010, 2011.
106. Wang, K., Liu, Y., Dong, L. and Chen, Z.: Characteristics of heavy minerals in the surface sediments of the Western Arctic Ocean, *Chin. J. Polar Res. (in Chinese)*, 26(1), 71-78, doi:10.13679/j.jdyj.2014.1.071, 2014.
107. Wang, K., Shi, X., Dong, J., Bosin, A. A., Astakhov, A. S. and Yao, Z.: Sediment provenance of the East Siberian Arctic Shelf and evidence of Holocene climate-driven fluvial events in the Indigirka River based on detrital mineral analysis, *Palaeogeogr., Palaeoclimatol., Palaeoecol.*, 638, 112042, doi:10.1016/j.palaeo.2024.112042, 2024.
108. Wang, K., Shi, X., Yao, Z., Bosin, A. A. and Hu, L.: Sediment sources and transport pathways on shelves of the Chukchi and East Siberian Seas: Evidence from the heavy minerals and garnet geochemistry, *Polar Sci.*, 33, 100873, doi:10.1016/j.polar.2022.100873, 2022.
109. Wang, R., Polyak, L., Zhang, W., Yu, X., Ye, L., Dong, L., Liu, Y., Wang, W. and

- Diekmann, B.: Glacial-interglacial sedimentation and paleocirculation at the Northwind Ridge, western Arctic Ocean, *Quat. Sci. Rev.*, 258, 106882, doi:10.1016/j.quascirev.2021.106882, 2021.
110. Weiel, D.: Clay mineralogy of sediment core PS2782-1, 80 data points, doi:10.1594/PANGAEA.101501, 2003.
111. Winter, B.L., Johnson, C.M. and Clark, D.L.: Strontium, neodymium, and lead isotope variations of authigenic and silicate sediment components from the Late Cenozoic Arctic Ocean: Implications for sediment provenance and the source of trace metals in seawater, *Geochim. Cosmochim. Acta*, 61(19), 4181-4200, doi:10.1016/S0016-7037(97)00215-9, 1997.
112. Xiao, W., Polyak, L., Wang, R., Not, C., Dong, L., Liu, Y., Ma, T. and Zhang, T.: A sedimentary record from the Makarov Basin, Arctic Ocean, reveals changing middle to Late Pleistocene glaciation patterns, *Quat. Sci. Rev.*, 270, 107176, doi:10.1016/j.quascirev.2021.107176, 2021.
113. Ye, L., Zhang, W., Wang, R., Yu, X. and Jin, L.: Ice events along the East Siberian continental margin during the last two glaciations: Evidence from clay minerals, *Mar. Geol.*, 428, 106289, doi:10.1016/j.margeo.2020.106289, 2020.
114. Zaripov, O. G.: Clay mineral composition of <0.001 mm grain size fraction of sedimentary rocks from Hole Pomorsk-1 drilled in the Barents Sea, In: Zaripov, Oktyabrist G; Pavlov, Leonid G; Preobrazhenskaya, Evelina N (1986): Processing results from drill hole Pomorsk-1 in the Pechora Sea, south-east Barents Sea, 160 data points, doi:10.1594/PANGAEA.619053, 1986.
115. Zaripov, O. G.: Clay mineral composition of <0.001 mm grain size fraction of sediments from Hole VNIIO-1986-NGul-01 drilled in the Barents Sea, In: Zaripov, Oktyabrist G; Pavlov, Leonid G; Ustinov, Nikolaj V; Preobrazhenskaya, Evelina N (1987): Processing results from parametric drill hole VNIIO-1986-NGul-01 at the North-Gulyaevskaya Area, 144 data points, doi:10.1594/PANGAEA.680779, 2008a.
116. Zaripov, O. G.: Clay mineral composition of <0.005 mm grain size fraction of sediments and sedimentary rocks from Hole VNIIO-1986-01 drilled in the Barents

Sea, In: Zaripov, Oktyabrist G; Pavlov, Leonid G (1987): Processing results from drill hole VNIIO-1986-01 in the North Murmanskaya Area, 920 data points, doi:10.1594/PANGAEA.678271, 2008b.

117. Zhao, S., Liu, Y., Dong, L., Shi, X., Polyak, L., Zou, X., Wang, W. and Wu, D.: Sedimentary record of glacial impacts and melt water discharge off the East Siberian Continental Margin, Arctic Ocean, *J. Geophys. Res. Oceans*, 127(1), e2021JC017650, doi:10.1029/2021JC017650, 2022.
